# Supplementary material for: Psychometric Assessment of the Japanese Version of the Zurich Claudication Questionnaire (ZCQ): Reliability and Validity
Source: PLoS One. 2016 Jul 28;11(7):e0160183. doi: 10.1371/journal.pone.0160183 (PMC4965020; doi:10.1371/journal.pone.0160183)
Supplement: S1 File — Dataset of this study. (XLS) [file pone.0160183.s001.xls]

## Sheet: Table1_background
ID	age	Disease_duration	Sex	Types_of_symptom	Surgery_type	Types_of_lumber_spinal_stenosis	Woking_status	Smoking
1	66	100	Female	Mixed	Decompression and fusion	Degenerativ	Out of	Non-smokers
2	77	54	Male	Mixed	Decompression and fusion	Degenerativ	Out of	Non-smokers
3	66	72	Female	Never root	Decompression only	Spondylosis	At work	Non-smokers
4	62	180	Female	Never root	Decompression and fusion	Degenerativ	Out of	Non-smokers
5	75	108	Male	Cauda equine	Decompression only	Spondylosis	Out of	Smokers
6	65	14	Male	Cauda equine	Decompression only	Spondylosis	At work	Smokers
7	79	180	Female	Mixed	Decompression only	Degenerativ	Out of	Non-smokers
8	59	5	Female	Mixed	Decompression and fusion	Degenerativ	Out of	Smokers
9	70	30	Male	Cauda equine	Decompression and fusion	Degenerativ	Out of	Non-smokers
10	74	7	Female	Mixed	Decompression only	Degenerativ	Out of	Non-smokers
11	55	11	Male	Never root	Decompression only	Spondylosis	At work	Smokers
12	69	22	Male	Never root	Decompression only	Spondylosis	At work	Smokers
13	82	36	Female	Mixed	Decompression and fusion	Spondylosis	Out of	Non-smokers
14	66	240	Male	Cauda equine	Decompression only	Degenerativ	Out of	Non-smokers
15	74	22	Female	Never root	Decompression only	Degenerativ	Out of	Non-smokers
16	54	40	Male	Never root	Decompression and fusion	Degenerativ	At work	Smokers
17	67	96	Female	Mixed	Decompression and fusion	Degenerativ	Out of	Non-smokers
18	79	10	Male	Mixed	Decompression only	Spondylosis	Out of	Smokers
19	61	24	Male	Cauda equine	Decompression only	Spondylosis	At work	Smokers
20	50	36	Female	Never root	Decompression only	Spondylosis	At work	Smokers
21	77	60	Female	Mixed	Decompression only	Degenerativ	Out of	Non-smokers
22	78	15	Male	Never root	Decompression only	Spondylosis	At work	Non-smokers
23	59	48	Male	Mixed	Decompression and fusion	Degenerativ	At work	Smokers
24	79	3	Male	Never root	Decompression only	Spondylosis	Out of	Non-smokers
27	36	15	Male	Never root	Decompression only	Spondylosis	At work	Smokers
28	70	204	Male	Cauda equine	Decompression only	Spondylosis	Out of	Non-smokers
29	81	30	Male	Mixed	Decompression only	Spondylosis	Out of	Smokers
31	72	24	Female	Never root	Decompression and fusion	Spondylosis	Out of	Non-smokers
32	40	300	Male	Cauda equine	Decompression and fusion	Spondylosis	At work	Smokers
33	68	8	Male	Never root	Decompression only	Spondylosis	At work	Smokers
34	76	16	Male	Cauda equine	Decompression and fusion	Isthmic spo	Out of	Smokers
35	71	66	Female	Cauda equine	Decompression and fusion	Degenerativ	At work	Non-smokers
36	79	48	Male	Cauda equine	Decompression only	Spondylosis	Out of	Non-smokers
37	69	18	Male	Never root	Decompression and fusion	Spondylosis	Out of	Non-smokers
38	65	19	Female	Never root	Decompression only	Spondylosis	Out of	Non-smokers
39	85	18	Female	Never root	Decompression only	Degenerativ	Out of	Non-smokers
40	78	6	Female	Mixed	Decompression only	Degenerativ	Out of	Non-smokers
41	63	14	Male	Never root	Decompression only	Spondylosis	At work	Non-smokers
42	61	24	Female	Mixed	Decompression and fusion	Degenerativ	At work	Smokers
43	75	198	Male	Mixed	Decompression and fusion	Degenerativ	Out of	Non-smokers
45	71	37	Male	Mixed	Decompression and fusion	Degenerativ	At work	Smokers
46	81	48	Male	Never root	Decompression and fusion	Degenerativ	Out of	Smokers
47	65	21	Female	Mixed	Decompression and fusion	Spondylosis	Out of	Smokers
48	72	3	Male	Mixed	Decompression only	Spondylosis	Out of	Non-smokers
49	72	19	Male	Mixed	Decompression only	Spondylosis	Out of	Non-smokers
50	79	60	Male	Never root	Decompression only	Spondylosis	Out of	Non-smokers
51	57	192	Male	Mixed	Decompression only	Spondylosis	At work	Non-smokers
52	72	36	Female	Mixed	Decompression only	Spondylosis	Out of	Non-smokers
53	77	26	Female	Mixed	Decompression only	Spondylosis	Out of	Non-smokers
54	53	36	Male	Never root	Decompression only	Spondylosis	At work	Smokers
55	69	24	Female	Mixed	Decompression only	Spondylosis	Out of	Non-smokers
56	80	96	Female	Never root	Decompression and fusion	Spondylosis	Out of	Smokers
57	78	60	Male	Mixed	Decompression only	Spondylosis	Out of	Smokers
58	78	96	Female	Mixed	Decompression only	Spondylosis	Out of	Non-smokers
59	67	60	Female	Mixed	Decompression only	Spondylosis	Out of	Non-smokers
60	67	6	Male	Never root	Decompression only	Spondylosis	Out of	Non-smokers
61		18		Never root	Decompression and fusion	Spondylosis	Out of	Non-smokers
62	79	10	Female	Never root	Decompression only	Spondylosis	Out of	Non-smokers
63	59	36	Male	Never root	Decompression and fusion	Degenerativ	At work	Non-smokers
64	83	96	Male	Cauda equine	Decompression only	Spondylosis	At work	Non-smokers
101	63	10	Male	Cauda equine	Decompression and fusion	Degenerativ	At work	Non-smokers
102	49	36	Male	Never root	Decompression and fusion	Isthmic spo	At work	Non-smokers
103	72	24	Male	Cauda equine	Decompression and fusion	Degenerativ		Smokers
104	72	36	Female	Mixed	Decompression and fusion	Degenerativ	Out of	Non-smokers
201	80	16	Male	Mixed	Decompression and fusion	Degenerativ	Out of	Non-smokers
202	79	29	Male	Never root	Decompression only	Spondylosis	Out of	Non-smokers
204	40	48	Male	Never root	Decompression and fusion	Degenerativ	At work	Smokers
205	56	42	Male	Cauda equine	Decompression only	Spondylosis	At work	Non-smokers
207	74	20	Female	Mixed	Decompression only	Spondylosis	Out of	Non-smokers
209	62	9	Male	Mixed	Decompression and fusion	Degenerativ	Out of	Non-smokers
210	79	60	Female	Never root	Decompression and fusion	Degenerativ	Out of	Non-smokers
211	53	16	Male	Mixed	Decompression and fusion	Spondylosis	Out of	Smokers
213	78	60	Male	Cauda equine	Decompression only	Spondylosis	Out of	Non-smokers
214	73	120	Male	Cauda equine	Decompression and fusion	Degenerativ	At work	Non-smokers
215	69	37	Female	Mixed	Decompression and fusion	Spondylosis	Out of	Non-smokers
217	72	6	Male	Never root	Decompression only	Spondylosis	At work	Non-smokers
218	74	120	Male	Cauda equine	Decompression and fusion	Degenerativ	Out of	Non-smokers
219	75	42	Female	Never root	Decompression and fusion	Degenerativ	Out of	Non-smokers
220	66	5	Male	Mixed	Decompression only	Spondylosis	At work	Non-smokers
301	61	8	Male	Mixed	Decompression only	Spondylosis	Out of	Non-smokers
302	76	2	Female	Mixed	Decompression only	Spondylosis	Out of	Non-smokers
303	72	36	Male	Never root	Decompression and fusion	Degenerativ	Out of	Smokers
304	70	36	Female	Mixed	Decompression and fusion	Degenerativ	Out of	Non-smokers
305	59	3	Male	Mixed	Decompression and fusion	Degenerativ	At work	Non-smokers
306	74	36	Male	Mixed	Decompression and fusion	Degenerativ	Out of	Non-smokers
307	60	2	Female	Never root	Decompression and fusion	Degenerativ	Out of	Non-smokers
308	68	15	Male	Never root	Decompression only	Spondylosis	At work	Smokers
309	75	5	Female	Never root	Decompression and fusion
401	60	48	Male	Mixed	Decompression only	Degenerativ	At work	Non-smokers
402	62	72	Male		Decompression and fusion	Spondylosis	At work	Smokers
501	62	4	Male	Never root	Decompression only	Spondylosis	Out of	Smokers
502	69	20	Female	Never root	Decompression and fusion	Spondylosis	Out of	Non-smokers
503	73	15	Male	Mixed	Decompression only	Spondylosis	Out of	Non-smokers
504	77	18	Male	Cauda equine	Decompression only	Spondylosis	Out of	Non-smokers
505	69	77	Female	Cauda equine	Decompression and fusion	Degenerativ	Out of	Non-smokers
506	71	52	Male	Cauda equine	Decompression and fusion	Degenerativ	Out of	Non-smokers
507	78	1	Female	Cauda equine	Decompression only	Degenerativ	Out of	Non-smokers
508	79	6	Female	Cauda equine	Decompression and fusion	Degenerativ	Out of	Non-smokers
509	62	5	Male	Cauda equine	Decompression and fusion	Degenerativ	At work	Smokers
510	75	12	Female	Cauda equine	Decompression and fusion	Degenerativ	Out of	Non-smokers
511	71	10	Female	Cauda equine	Decompression and fusion	Degenerativ	Out of	Non-smokers
512	63	38	Male	Cauda equine	Decompression and fusion	Degenerativ	Out of	Non-smokers
513	81	12	Female	Mixed	Decompression only	Spondylosis	Out of	Non-smokers
514	68	26	Female	Cauda equine	Decompression and fusion	Degenerativ	Out of	Non-smokers
515	54	3	Male	Never root	Decompression only	Spondylosis	At work	Non-smokers
516	75	18	Female	Never root	Decompression and fusion	Spondylosis	Out of	Non-smokers
517	83	1	Female	Cauda equine	Decompression only		Out of	Non-smokers
518	69	24	Male	Cauda equine	Decompression and fusion	Spondylosis	Out of	Non-smokers
519	80	48	Female	Cauda equine	Decompression and fusion	Degenerativ	Out of	Non-smokers
520	65	43	Female	Never root	Decompression only	Spondylosis	Out of	Non-smokers
521	73	30	Female	Mixed	Decompression and fusion	Degenerativ	Out of	Non-smokers
522	65	24	Male	Mixed	Decompression and fusion	Degenerativ	At work	Non-smokers
523	67	20	Male	Cauda equine	Decompression only	Spondylosis	Out of	Non-smokers
524	52	7	Male	Cauda equine	Decompression and fusion	Degenerativ	At work	Non-smokers
525	77	6	Male	Mixed	Decompression and fusion	Degenerativ	Out of	Non-smokers
526	73	48		Cauda equine	Decompression only	Spondylosis	Out of	Smokers
527	43	9	Male	Never root	Decompression and fusion	Isthmic spo	At work	Smokers
528	72	5	Female	Cauda equine	Decompression and fusion	Degenerativ	Out of	Non-smokers
529	75	30	Male	Cauda equine	Decompression and fusion	Degenerativ	Out of	Non-smokers
530	74	60		Cauda equine	Decompression only	Spondylosis	At work	Non-smokers
531	74	6	Male	Cauda equine	Decompression and fusion	Degenerativ	Out of	Smokers
532	74	24	Male	Mixed	Decompression only	Spondylosis	Out of	Non-smokers
533	83	3	Female	Cauda equine	Decompression and fusion	Spondylosis	Out of	Non-smokers
534	84	60	Female	Cauda equine	Decompression only	Spondylosis	Out of	Non-smokers
535	65	120	Female	Cauda equine	Decompression and fusion	Degenerativ	Out of	Non-smokers
536	29	12	Male	Never root	Decompression and fusion	Isthmic spo	At work	Smokers
537	69	36	Female	Cauda equine	Decompression and fusion	Degenerativ	At work	Non-smokers
538	69	84	Male	Cauda equine	Decompression only	Spondylosis	Out of	Non-smokers
539	75	36	Female	Cauda equine	Decompression and fusion	Degenerativ	Out of	Non-smokers
540	64	60	Female	Cauda equine	Decompression and fusion	Degenerativ	Out of	Non-smokers
541	52	84	Female	Mixed	Decompression and fusion	Degenerativ	At work	Non-smokers
542	73	5	Female	Cauda equine	Decompression and fusion	Degenerativ	Out of	Non-smokers
543	80	15	Male	Cauda equine	Decompression and fusion	Degenerativ	Out of	Non-smokers
544	77	6	Female	Mixed	Decompression and fusion	Degenerativ	Out of	Non-smokers
545	69	14	Female	Never root	Decompression and fusion	Degenerativ	Out of	Non-smokers
546	52	72	Male	Cauda equine	Decompression and fusion	Degenerativ	At work	Non-smokers
547	58	24	Male	Cauda equine	Decompression only	Spondylosis	At work	Non-smokers
548	61	48	Female	Cauda equine	Decompression and fusion	Degenerativ	At work	Smokers
549	58	36	Male	Cauda equine	Decompression and fusion	Degenerativ	At work	Smokers
601	57	8	Female	Never root	Decompression and fusion	Degenerativ	At work	Non-smokers
602	68	360	Female	Mixed	Decompression and fusion	Spondylosis	Out of	Non-smokers
604	83	120	Female	Mixed	Decompression and fusion	Degenerativ	Out of	Non-smokers
605	71	156	Male	Mixed	Decompression and fusion	Degenerativ	Out of	Non-smokers
606	60	84	Male	Mixed	Decompression and fusion	Spondylosis	At work	Smokers
607	62	132	Male	Cauda equine	Decompression only	Spondylosis	At work	Non-smokers
608	66	60	Female	Mixed	Decompression and fusion	Degenerativ	Out of	Non-smokers
609	81	24	Male	Mixed	Decompression only	Spondylosis	Out of	Non-smokers
610	73	48	Male	Never root	Decompression and fusion	Spondylosis	Out of	Non-smokers
611	51	24	Male	Mixed	Decompression and fusion	Spondylosis	At work	Non-smokers
613	63		Male	Mixed	Decompression and fusion	Degenerativ	At work	Smokers
701	59	3	Male	Never root	Decompression only	Spondylosis	At work	Non-smokers
702	70	2	Male	Mixed	Decompression only	Spondylosis	At work	Non-smokers
703	66	36	Male	Cauda equine	Decompression only	Spondylosis	Out of	Non-smokers
801	58	0	Female	Cauda equine	Decompression only	Spondylosis	At work	Non-smokers
802	66	5	Female	Cauda equine	Decompression and fusion	Degenerativ	Out of	Non-smokers
803	67	24	Male	Cauda equine	Decompression and fusion	Spondylosis	At work	Smokers
804	77	49	Male		Decompression only	Spondylosis	Out of	Non-smokers
805	73	4	Male		Decompression only	Spondylosis	At work	Non-smokers
806	69	3	Female	Mixed	Decompression and fusion	Degenerativ	Out of	Smokers
807	69	84	Male	Cauda equine	Decompression only	Spondylosis	At work	Non-smokers
808	61	324	Male	Never root	Decompression and fusion	Spondylosis	At work	Smokers
809	67	4	Male		Decompression only	Spondylosis	Out of	Non-smokers
901	78	4	Male	Mixed	Decompression and fusion	Degenerativ	Out of	Non-smokers
902	58	3	Female	Never root	Decompression only	Spondylosis	Out of	Smokers
903	37	36	Male	Cauda equine	Decompression only	Spondylosis	At work	Non-smokers
904	73		Female	Mixed	Decompression and fusion	Degenerativ	Out of	Non-smokers
905	60	12	Female	Mixed	Decompression and fusion	Degenerativ	Out of	Non-smokers
906	69	36	Male	Cauda equine	Decompression only	Spondylosis	Out of	Smokers
907	60	6	Female	Never root	Decompression only	Spondylosis	Out of	Non-smokers
908	64	18	Female	Never root	Decompression and fusion	Degenerativ	Out of	Smokers
909	77	24	Female	Mixed	Decompression and fusion	Degenerativ	Out of	Non-smokers
910	71	18	Female	Mixed	Decompression and fusion	Degenerativ	Out of	Non-smokers
911	81	12	Female	Never root	Decompression and fusion	Degenerativ	Out of	Non-smokers
912	66	6	Male	Never root	Decompression only	Spondylosis	At work	Non-smokers
1001	74	60	Male	Never root	Decompression only	Spondylosis	Out of	Non-smokers
1002	59	24	Male	Mixed	Decompression and fusion	Degenerativ	At work	Non-smokers
1003	74	60	Female	Mixed	Decompression and fusion	Degenerativ	Out of	Non-smokers
1004	58	72	Male	Cauda equine	Decompression only	Spondylosis	At work	Non-smokers
1005	67	27	Female	Mixed	Decompression and fusion	Degenerativ	Out of	Non-smokers
1101	52	60	Female	Mixed	Decompression and fusion	Degenerativ	Out of	Non-smokers
1102	71	8	Female	Never root	Decompression only	Spondylosis	Out of	Non-smokers
1103	79	2	Male	Never root	Decompression only	Spondylosis	Out of	Non-smokers
1104	77	9	Female	Mixed	Decompression only	Spondylosis	At work	Non-smokers
1105	60	9	Male	Cauda equine	Decompression and fusion	Degenerativ	At work	Smokers
1106	56	120	Female	Mixed	Decompression and fusion	Degenerativ	Out of	Non-smokers
1107	77	36	Male	Cauda equine	Decompression only	Spondylosis	Out of	Non-smokers
1108	67	7	Male	Mixed	Decompression and fusion	Degenerativ	Out of	Smokers
1109	80	60	Male	Never root	Decompression only	Spondylosis	Out of	Non-smokers
1110	70	24	Female	Cauda equine	Decompression only	Degenerativ	Out of	Non-smokers
1111	76	120	Male	Cauda equine	Decompression only	Spondylosis	Out of	Non-smokers
1112	63	6	Male	Cauda equine	Decompression only	Spondylosis	At work	Smokers
1113	65	48	Male	Mixed	Decompression only	Degenerativ	At work	Non-smokers
1114	78	54	Male	Never root	Decompression only	Degenerativ	Out of	Non-smokers
1115	52	4	Male	Mixed	Decompression only	Degenerativ	At work	Non-smokers
1116	76	120	Male	Cauda equine	Decompression only	Spondylosis	Out of	Non-smokers

## Sheet: Table2-4_pre-surgery
ID	ZCQsymptom	ZCQfunction	ODI	VAS_low_back_pain	VAS_leg_pain	VAS_leg_numbness	SF36_physical_functioning	SF36_role_limitations_physical	SF36_bodily_pain	SF36_social_functioning	SF36_general_health	SF36_vitality	SF36_role_limitations_emotional	SF36_metal_health
1	4	3	55.6	7	9	9
2	3.42857	2.6	40	5	6	8	41	25.6	35.8	30.8	45.1	41	18.3	46.5
3	3.14286	2.6	24		9	9	48.1	18.8	26.9	43.9	51.6	28.7	22.5	25.2
4	3.85714	3	68.9	9	9	9	-4.7	22.1	35.8	24.2	31.6	34.9	22.5	41.1
5	2.42857	2.2	24.4	4	4	6	41	49.4	39.7	57.1	67.8	59.5	56.6	59.7
6	2.57143	2.8	26.7	2.8	5.3	5.3	37.5	42.6	35.3	30.8	51.6	44.1	56.6	57.1
7	3.28571	2	35.6	4	4	8	34	29	35.3	50.5	51.6	53.3	31.1	51.8
8	3.42857	2.6	60	10	6.7	6.7	16.4	29	35.8	30.8	43.5	44.1	31.1	35.8
9	4	3	75.6	6.9	4.7	4.7	2.3	15.3	35.8	17.6	31.6	34.9	18.3	25.2
10	3.57143	3	46.7	0	7.2	5.3	27	11.9	22.5	24.2	48.9	25.6	9.8	38.5
11	3.28571	3	50	1.8	4.8	4.8	23.4	39.2	26.9	11.1	46.2	47.2	22.5	43.8
12	2.57143	2.8	13.3	1.9	5.6	5.5	41	42.6	44.6	37.4	42.4	44.1	52.3	35.8
13	3.85714	3	73.3	9.2	8.8	8.9	5.8	1.7	22.5	24.2	40.8	50.2	5.6	59.7
14	3.28571	2.8	44	7	7	9	19.9	11.9	22.5	-2.1	39.7	7.2	5.6	-1.4
15	2.71429	2.6	31.1	4	4	4	23.4	32.4	35.3	30.8	43.5	37.9	31.1	35.8
16	2	1.8	14	2.4	2.4	2.4	51.6	56.2	49	50.5	59.7	50.2	56.6	59.7
17	3.14286	3	60	8	9	10	55.1	8.5	26.9	30.8	31.6	37.9	22.5	33.2
18	3.57143	3.6	73.3	8	8	6
19	3.28571	1.6	35.6	7	5	7.5	27	29	31.3	30.8	39.7	50.2	43.8	51.8
20	2.85714	2.8	31.1	0.2	8	8	51.6	56.2	39.7	57.1	48.9	47.2	52.3	57.1
21	3.71429	2.8	33.3	8	9	6	37.5	29	31.3	43.9	46.2	47.2	43.8	54.4
22	2.85714	2	44	2	8	1	41	35.8	35.3	30.8	46.2	44.1	39.6	41.1
23	2.71429	2	22	0.9	3.2	0.8
24	3.28571	2.6	54	6	7	5	9.4	8.5	22.5	30.8	31.6	34.9	14.1	30.5
27	2.42857	1.8	28	6	6	5	48.1	56.2	39.7	57.1	51.6	50.2	56.6	43.8
28	3.85714	3	52	8.4	8	7.5	9.4	18.8	22.5	11.1	28.9	28.7	18.3	33.2
29	3.14286	2	38	6.7	9.1	9.3	27	29	49.9	37.4	43.5	41	31.1	38.5
31	3.85714	3.4	46.7	8.3	9.5	9.5	19.9	-12	8.3	-8.7	39.7	7.2	-7.2	-1.4
32	2.57143	1.8	47.5	1	8	1	19.9	39.2	35.3	37.4	43.5	53.3	56.6	51.8
42	3.57143	3	34	5	6	7	44.6	56.2	26.9	17.6	46.2	50.2	48	49.1
43	3.42857	2.6	58	5	7	7	12.9	18.8	30.9	30.8	38.1	41	18.3	25.2
46	3	2.4	26	4.5	5.5	4.8	12.9	25.6	31.3	50.5	39.7	41	31.1	38.5
47	4.71429	3.4	80	5	8	10	27	5.1	17.2	30.8	31.6	25.6	5.6	22.5
48	3.28571	3	62.2	9	8	8	27	29	26.9	24.2	34.3	37.9	31.1	33.2
49	3.85714	3	70	9	9	9	2.3	15.3	22.5	4.5	28.9	19.5	18.3	19.9
50	2.85714	2.2	44.4	8	7	7	16.4	29	30.9	17.6	46.2	50.2	43.8	49.1
51	3.71429	3.2	58	9	9	8	-1.2	11.9	22.5	4.5	34.3	25.6	31.1	22.5
52	3.71429	3	48	8.4	8.6	10	37.5	52.9	35.8	50.5	50.5	44.1	56.6	41.1
54	3	2.6	36	5	8	8	12.9	18.8	30.9	30.8	40.8	37.9	22.5	33.2
55	4	3.2	60	8.3	9	9	2.3	8.5	26.9	4.5	20.8	31.8	14.1	38.5
56	4.14286	3.6	53.3	8.5	8.6	8.4	-4.7	1.7	22.5	30.8	37	34.9	5.6	51.8
57	2.57143	2.8	6.7				12.9	1.7	30.9	37.4	57	28.7	5.6	19.9
59	3.57143	2	33.3	6.2	5.2	5.4	19.9	8.5	31.3	30.8	28.9	34.9	26.8	35.8
60	3.14286	3.2	68.9	9	10	2	41	32.4	22.5	30.8	43.5	41	26.8	43.8
62	3.42857	2.6	33.3	0.8	5.6	8.4	37.5	46	40.2	50.5	55.9	50.2	52.3	57.1
63	3.85714	1.4	20		5	8	55.1	52.9	49	57.1	54.3	53.3	56.6	59.7
64	3.8	3	36	7	3	8	27	29	26.9	30.8	39.7	37.9	31.1	38.5
101	5	3.6	90	10	10	10	-4.7	1.7	17.2	4.5	23.5	31.8	5.6	33.2
102	2.71429	2	28.9	5.1	6.7	1.3	41	42.6	35.3	30.8	48.9	47.2	35.3	43.8
103	4.16667	2.8	46.7	6.3	3.8	4.4	16.4	18.8	26.9	24.2	48.9	31.8	26.8	25.2
104	2.71429	3.4	85		9		51.6	56.2	17.2	57.1	67.8	68.7	56.6	65.1
201	4.14286	3.6	53.3	7	7	7	-1.2	1.7	22.5	-2.1	39.7	37.9	5.6	19.9
202	3.14286	2.6	24.4	0.2	0.2	0.3	41	29	35.8	24.2	46.2	47.2	31.1	41.1
204	3.85714	2.8	30	6	6	5	27	49.4	31.3	37.4	47.8	31.8	39.6	33.2
205	2.71429	2.2	31.1	4	2	6	30.5	42.6	35.3	30.8	34.3	41	43.8	57.1
207	3.71429	3.4	32	4.7	8.4	8.8	23.4	39.2	26.9	30.8	47.8	44.1	39.6	46.5
209	3.85714	2.8	51.1	5.6	8.7	8.5	23.4	15.3	31.3	30.8	45.1	44.1	18.3	35.8
210	3	3	40	5.8	5.5	8.7	5.8	8.5	30.9	43.9	59.7	44.1	56.6	65.1
211	3.14286	2.6	62.2	8	7	3	9.4	1.7	22.5	4.5	32.7	37.9	56.6	51.8
213	2.71429	1.6	11.1	5	4	5	41	39.2	35.3	50.5	42.4	56.4	52.3	49.1
214	4.42857	3.6	78	8.9	8.9	8.9	-1.2	15.3	26.9	11.1	39.7	34.9	18.3	27.8
215	5	3.4	68.9	10	10	10	5.8	8.5	17.2	30.8	43.5	19.5	5.6	22.5
218	3.57143	3.2	48.9	5	6	7	9.4	8.5	22.5	4.5	24.6	25.6	9.8	22.5
219	3.42857	3	40	2	7	4	19.9	35.8	31.3	17.6	37	28.7	35.3	30.5
220	3.71429	3.2	55.6	6.3	1.6	4.6	2.3	18.8	30.9	24.2	34.3	34.9	18.3	33.2
301	4.28571	3.25	64	8.6	7.8	10	-1.2	1.7	26.9	17.6	20.8	34.9	9.8	25.2
302	2.42857	2.8	30	0	8	1	41	22.1	26.9	30.8	34.3	41	31.1	33.2
303	3.28571	2.4	44.4	2.2	2.1	0.6	5.8	18.8	26.9	11.1	28.9	25.6	22.5	19.9
304	3.57143	3	48.9	8	8	8	12.9	15.3	26.9	24.2	39.7	31.8	18.3	33.2
305	3.57143	3	33.3	7.6	7.9	8.4	16.4	52.9	40.2	57.1	43.5	53.3	56.6	59.7
306	3.2	2.8	20	1.1	1.2	0.9	19.9	29	40.2	43.9	43.5	47.2	31.1	49.1
307	3.66667	2.8	27.5				-47	-12	35.3	17.6	34.3	56.4	-7.2	49.1
308	4.28571	3	46.7	3	4	4	27	22.1	35.8	30.8	39.7	37.9	18.3	30.5
401	2.28571	2	20	3	1	1	44.6	56.2	49	57.1	46.2	47.2	56.6	54.4
402	3.57143	3	64.4	10	0	10	12.9	1.7	17.2	11.1	37	19.5	5.6	33.2
501	3.14286	2	24	3	3	8.5	5.8	11.9	35.8	4.5	46.2	44.1	35.3	46.5
502	4.28571	3.4	64.4	9	9	9	-4.7	1.7	26.9	11.1	15.4	19.5	5.6	11.9
503	3.57143	2.8	31.1	8	8	4	30.5	29	26.9	43.9	51.6	53.3	18.3	46.5
504	3.14286	2	28.9	3	3	7	30.5	25.6	26.9	17.6	39.7	34.9	18.3	35.8
505	4.28571	3	62	8.2	9.1	8.9	34	22.1	22.5	24.2	34.3	34.9	14.1	41.1
506	4	2.6	37.8	4.1	4.8	8.6	9.4	22.1	26	37.4	43.5	53.3	31.1	35.8
507	2.2	3.2	52.5	4.4	4.4		-1.2	8.5	35.3	50.5	39.7	19.5	14.1	19.9
508	4.14286	3.6	77.5	0.4	3.8	9.7	-8.2	32.4	17.2	57.1	62.4	31.8	31.1	49.1
509	3.71429	3	48.6	10	10	10	-8.2	18.8	22.5	50.5	31.6	44.1	56.6	33.2
510	4.57143	3.75	92.5				-8.2	-12	26.9	11.1	28.9	31.8	-7.2	22.5
511	3	2.2	51.1	2	7	5	9.4	18.8	30.9	17.6	39.7	41	22.5	38.5
512	3.42857	3.2	52.5	7	8	0	12.9	25.6	31.3	24.2	35.4	53.3	31.1	54.4
513	3.42857	3.2	62.2	6.4	7.8	8.2	23.4	11.9	26.9	11.1	34.3	28.7	14.1	19.9
514	2.71429	2	26.7	3	6	3	34	29	35.3	24.2	37	41	18.3	30.5
515	2.85714	2.2	74	6.8	4.4	4.8	16.4	11.9	30.9	30.8	40.8	25.6	5.6	19.9
516	4.16667	3.2	68	8.3	9.2	9.1	-22.3	-5.1	26.9	11.1	57	13.3	18.3	3.9
517	3.71429	3.2	53.3	5	8		5.8	22.1	35.3	57.1	45.1	53.3	31.1	49.1
518	3.28571	3.4	66.7	7.2	8.5	9.3	19.9	25.6	30.9	37.4	39.7	37.9	-7.2	38.5
519	3.57143	3	50	5	5	5	-8.2	15.3	30.9	30.8	39.7	41	35.3	38.5
520	3.71429	3	64.4	9	9	3	-4.7	1.7	22.5	30.8	31.6	22.6	5.6	33.2
521	3.71429	2.4	60	4.7	9.6	7.5	34	11.9	17.2	17.6	26.2	28.7	9.8	27.8
522	4.28571	3.2	55.6	4	10	10	30.5	15.3	26.9	17.6	46.2	44.1	22.5	38.5
523	3.28571	2.25	13.3	0	7.8	5.5	27	11.9	48.1	17.6	40.8	44.1	14.1	22.5
524	4.14286	2.6	40	3	9	1	16.4	35.8	31.3	37.4	46.2	47.2	31.1	41.1
525	4	2.5					-47	-12	8.3	-8.7	42.4	7.2	-7.2	-1.4
526	2.57143	2.2	27.5				27	32.4	44.6	57.1	46.2	34.9	31.1	43.8
527	2.42857	2.8	30	3	7.2	3	30.5	35.8	30.9	43.9	57	41	31.1	30.5
528	4.85714	3.6	57.8	4.5	6.3	8.5	-15.3	29	21.6	37.4	43.5	53.3	18.3	30.5
529	3.14286	3	44.4	4	7	7	23.4	15.3	30.9	17.6	37	25.6	18.3	25.2
530	2.42857	2	22.2	4	5	4	44.6	39.2	44.6	50.5	45.1	59.5	56.6	57.1
531	2.28571	1	24	5		3	41	46	35.3	57.1	57	44.1	56.6	51.8
532	3.57143	3	53.3	5	7	9	19.9	22.1	30.9	37.4	34.3	41	14.1	38.5
533	4.28571	3.6	68.9	8.2	8.3	5.3	-8.2	22.1	26.9	11.1	38.1	50.2	-7.2	51.8
534	3.57143	3.2	53.3		5	10	-8.2	22.1	30.9	24.2	37	22.6	56.6	14.6
535	4.14286	3	55.6	9	8	9	-4.7	1.7	26.9	24.2	28.9	28.7	5.6	27.8
536	3.57143	3.2	48	8.1	8.4	7.4	27	-1.8	22.5	24.2	43.5	41	18.3	35.8
537	5	3.4	80	10	10	10	-8.2	1.7	17.2	4.5	37	19.5	18.3	17.2
538	3.85714	3	48.9	3	8	5	16.4	15.3	26.9	17.6	48.9	47.2	5.6	41.1
539	2.28571	1.8	24.4				30.5	25.6	40.2	37.4	47.8	44.1	35.3	35.8
540	2.85714	3	35.6	5	8	5	12.9	39.2	31.3	50.5	67.8	68.7	43.8	54.4
541	3.71429	3.2	74	9	7	7	5.8	8.5	17.2	24.2	45.1	28.7	14.1	25.2
542	2.85714	2.4	31.1	8	7	4	19.9	29	26.9	30.8	48.9	41	35.3	46.5
543	3.14286	2.2	46	4	4	4	9.4	29	45.5	30.8	39.7	44.1	31.1	38.5
544	3.57143	3.2	48.9	10			9.4	8.5	30.9	17.6	34.3	31.8	18.3	41.1
545	3.71429	3.2	64.4	8	8.5	5	16.4	49.4	26.9	4.5	37	44.1	43.8	41.1
546	3	2.2	42	9	7	1	9.4	15.3	26.9	4.5	37	19.5	5.6	11.9
547	3.28571	2	32	6	6	7	44.6	29	30.9	24.2	45.1	25.6	26.8	22.5
548	5	3.2	66	7	9	9	-1.2	1.7	26.9	17.6	32.7	22.6	31.1	22.5
549	3.28571	2.2	26.7	3.4	2.7	5.8	44.6	22.1	35.3	24.2	37	34.9	39.6	38.5
601	2.71429	2	20	9	8	7	48.1	39.2	35.3	57.1	31.6	47.2	35.3	49.1
602	4.71429	3.6	82.2	10	10	10	-4.7	11.9	8.3	-2.1	26.2	25.6	18.3	33.2
604	4	3	46.7	7	9	9	2.3	35.8	31.3	30.8	43.5	34.9	31.1	38.5
605	2.28571	2	24.4	2	7	6	19.9	56.2	49	50.5	48.9	62.5	56.6	57.1
606	3	2.4	13.3	0	3.4	3	41	35.8	44.6	17.6	34.3	34.9	31.1	19.9
607	3	2.2	28	2	8	8	37.5	42.6	39.7	50.5	43.5	50.2	43.8	49.1
608	2.85714	2	31.1	5	5	0	44.6	29	31.3	43.9	26.2	37.9	43.8	33.2
609	2.71429	1.8	20	1.9	4.2	5.2	34	42.6	44.6	43.9	43.5	53.3	43.8	57.1
610	4.14286	2.2	64.4	7	7	7	9.4	25.6	30.9	11.1	37	31.8	31.1	30.5
611	3.42857	2.8	35.6	3.5	7.2	7.2	27	35.8	35.3	30.8	40.8	37.9	31.1	30.5
613	3.42857	3	46.7	7	7	8	9.4	8.5	30.9	17.6	39.7	28.7	18.3	22.5
701	3.85714	3.6	72	3	9	4	9.4	1.7	17.2	4.5	34.3	25.6	5.6	22.5
702	3.14286	2	51.1	0	6.5	6.6	23.4	15.3	30.9	43.9	48.9	44.1	18.3	38.5
703	2.71429	2.2	31.1	3.6	0.6	6.5	34	18.8	35.8	30.8	31.6	28.7	26.8	33.2
801	3.85714	2.6	33.3	3.2	7.9	8	23.4	22.1	31.3	30.8	37	47.2	22.5	51.8
802	3.71429	3.2	55.6	7	7	7	-4.7	11.9	22.5	11.1	20.8	31.8	5.6	22.5
803	3.28571	2.8	42.2	5	3	3	19.9	25.6	35.3	30.8	42.4	41	31.1	38.5
804	3	2	32	3	4	4	27	29	40.2	37.4	39.7	50.2	31.1	38.5
805	3.42857	3.6	71.1	5	8	7	2.3	1.7	22.5	11.1	51.6	37.9	18.3	33.2
806	3.71429	3.4	64.4	0	6.5		9.4	18.8	17.2	50.5	54.3	50.2	5.6	35.8
807	4.57143	3	40	10	10	10	27	39.2	21.6	50.5	39.7	50.2	52.3	57.1
808	3.14286	2.8	35.6	7	7	7	19.9	15.3	26.9	30.8	37	47.2	18.3	38.5
809	2.14286	1.8	28	7	7		48.1	35.8	40.2	30.8	43.5	44.1	43.8	51.8
901	3.28571	3.4	66.7	5	5	3	12.9	8.5	30.9	4.5	34.3	22.6	18.3	35.8
902	3.57143	3	44.4	5.6	7.5	7.7	19.9	15.3	26.9	57.1	37	34.9	22.5	46.5
903	2.14286	1.4	16	1	1	2	44.6	42.6	44.6	43.9	46.2	50.2	43.8	38.5
904	2.42857	3.2	71.1	5.9	7.2	8.6	5.8	18.8	35.8	43.9	28.9	47.2	31.1	43.8
905	2.71429	2.2	26.7	8	6	5	37.5	46	35.8	50.5	48.9	47.2	56.6	51.8
906	2.57143	2	26	0.9	2.5	2.3	37.5	29	40.2	43.9	46.2	56.4	31.1	54.4
907	3.28571	2.4	40	0.4	4.9	4.8	34	18.8	30.9	37.4	46.2	31.8	22.5	27.8
908	4.85714	3.6	78	9	9	9	-8.2	1.7	17.2	4.5	28.9	19.5	5.6	25.2
909	4	2.2	53.3	5.1	10	5.8
910	3.42857	2.8	44.4	7.3	8	6.7	16.4	25.6	30.9	4.5	47.8	25.6	5.6	43.8
911	2.85714	2.4	46.7	8	8		12.9	25.6	26.9	30.8	42.4	41	31.1	35.8
912	4.42857	2.6	68.9	6.5	8.5	8.5	12.9	15.3	17.2	11.1	48.9	56.4	56.6	51.8
1001	3.33333	1.8	31.1	2	8	7	44.6	35.8	30.9	17.6	40.8	44.1	35.3	49.1
1002	1.85714	1.6	15.6	1.5	1.5	1.5	51.6	56.2	49	57.1	62.4	59.5	56.6	65.1
1003	3.57143	3	33.3	9	8.5	8.6	-1.2	18.8	34.9	57.1	37	41	26.8	43.8
1004	4	2.4	33.3	9	9	10	44.6	46	35.8	50.5	57	34.9	39.6	43.8
1005	3.28571	3.6	72	1.7	9.1	9.2	5.8	1.7	22.5	30.8	58.6	19.5	5.6	49.1
1101	3.28571	2.8	40	8.3	7.7	6.6	19.9	18.8	26.9	11.1	45.1	28.7	26.8	35.8
1102	3.14286	2.2	34	1.2	1.2	0	37.5	49.4	35.3	43.9	51.6	34.9	52.3	41.1
1103	3.28571	3	52	0	0	5	9.4	29	17.2	4.5	31.6	34.9	31.1	33.2
1104	3.42857	2.4	40	1.9	5.9	2	19.9	35.8	35.3	57.1	48.9	56.4	43.8	62.4
1105	3.14286	2	31.1	6	6	8	48.1	39.2	35.3	37.4	37	50.2	43.8	38.5
1106	4.42857	2.8	53.3	7.7	7.6	6.7	27	5.1	22.5	17.6	39.7	22.6	9.8	11.9
1107	3.28571	2.4	30	4	5	6	34	32.4	35.3	57.1	54.3	53.3	35.3	59.7
1108	1.57143	1.8	24.4	0	0	0	48.1	39.2	45.5	43.9	43.5	47.2	31.1	49.1
1109	3.28571	3	48.9	7	7	7	16.4	29	31.3	43.9	62.4	41	31.1	43.8
1110	3.42857	2	20	2	4	6	41	32.4	21.6	24.2	45.1	47.2	39.6	46.5
1111	2.42857	1.8	15.6	6	1	1	27	29	40.2	57.1	46.2	37.9	9.8	30.5
1112	2.85714	2.8	46.7	5	6	2	41	1.7	30.9	30.8	43.5	31.8	5.6	27.8
1113	3.57143	2	26	6	4	7	19.9	25.6	35.8	24.2	43.5	53.3	26.8	54.4
1114	3.57143	2.6	53.3	5	7	6	12.9	15.3	22.5	17.6	34.3	25.6	14.1	25.2
1115	3.28571	2.4	26	4.8	4.8	3.3	34	15.3	35.3	24.2	37	31.8	31.1	38.5
1116	4.42857	3.2	48	8.9	7.5	9.1	-8.2	35.8	22.5	43.9	47.8	28.7	9.8	43.8

## Sheet: Table2-4_3M_after_surgery
ID	ZCQsymptom	ZCQfunction	ZCQsatisfuction	ODI	VAS_low_back_pain	VAS_leg_pain	VAS_leg_numbness	SF36_physical_functioning	SF36_role_limitations_physical	SF36_bodily_pain	SF36_social_functioning	SF36_general_health	SF36_vitality	SF36_role_limitations_emotional	SF36_metal_health
1	2.85714	1.6	2.5	33.3	1	2	5.5	37.5	39.2	35.3	24.2	48.9	50.2	43.8	46.5
2	2.71429	1.8	2.66667	31.1	4	3	6	48.1	-5.1	44.6	11.1	45.1	47.2	22.5	43.8
3	2.14286	1.6	1.83333	18	5	0	5	48.1	56.2	49	57.1	54.3	59.5	56.6	51.8
4	2.28571	2	1.66667	22.2	4	0	0	27	18.8	35.8	43.9	62.4	47.2	5.6	51.8
5	1	1	1	0	0	0	0	55.1	42.6	44.6	43.9	57	50.2	43.8	43.8
6	1.42857	1	1	4	0.8	0	0	51.6	46	44.6	37.4	59.7	56.4	39.6	51.8
7	1.83333	1.2	1.33333	11.1	0	0	3	51.6	56.2	52.6	50.5	59.7	62.5	56.6	59.7
9	1.42857	1.4	1.5	8.9	0	0	0	44.6	32.4	52.6	24.2	48.9	56.4	43.8	49.1
10	2	1.2	2	4.4	0	0	5.3	51.6	42.6	61.4	37.4	38.1	47.2	56.6	49.1
11	1.71429	1.2	1.33333	22	0.9	0.9	0.8	37.5	46	40.2	50.5	59.7	47.2	56.6	57.1
12	2.16667	2	2	13.3	0	3.9	5.2	55.1	42.6	40.2	43.9	43.5	44.1	52.3	43.8
14	2.33333	1	2.16667	0	0	2	8	41	29	61.4	43.9	40.8	53.3	56.6	57.1
15	1.57143	1.2	1.66667	2.2	0.5	0.4	0.6	44.6	56.2	61.4	57.1	43.5	53.3	56.6	49.1
16	2	1	1	6	1.2	0	0	55.1	52.9	44.2	57.1	51.6	56.4	56.6	54.4
17	2	2.2	1.5	31.1	1.1	0.9	0.9	30.5	39.2	44.6	43.9	43.5	41	39.6	49.1
18	2.14286	1.6	1.5	22.2	2	2	2	34	18.8	35.8	24.2	34.3	47.2	18.3	41.1
19	2.14286	1	1.33333	0	0.2	0.2	0.3	55.1	56.2	54.3	57.1	51.6	50.2	56.6	54.4
20	1.85714	1.4	1.83333	11.1	2.4	0.8	3.3	55.1	56.2	49	57.1	43.5	56.4	56.6	57.1
21	1.71429	1	1.66667	0	0	2	3	51.6	52.9	34.9	57.1	62.4	65.6	56.6	65.1
22	2	1.8	1.5	8.9	1	1	2	48.1	32.4	40.2	37.4	46.2	44.1	31.1	41.1
27	1.14286	1.2	1	4	1	1	1	58.7	56.2	61.4	57.1	46.2	56.4	56.6	54.4
33	2.85714	2.4	3.5	35.6	4	7	5	34	25.6	35.3	30.8	34.3	34.9	35.3	35.8
35	2.28571	1.8	2	40			1	37.5	8.5	30.9	24.2	39.7	19.5	18.3	22.5
36	2.57143	1.4	1.66667	24.4	1	5	2	41	35.8	40.2	50.5	42.4	50.2	35.3	38.5
37	1.42857	1	1.83333	22.2	1.6	1.4	2.1	23.4	15.3	45.5	24.2	48.9	47.2	22.5	49.1
38	1.71429	1.2	1.5	4	0.6	1.6	0	44.6	42.6	54.3	43.9	43.5	56.4	39.6	54.4
39	3.57143	3	3.5	47.5	7	7	5	5.8	11.9	26.9	17.6	28.9	37.9	43.8	46.5
40	2.42857	3.2	2.83333	40	5			-15.3	29	30.9	30.8	50.5	16.4	31.1	6.6
41	2.85714	1.2	2	14	2	5	5	34	35.8	35.3	43.9	43.5	53.3	43.8	41.1
42	1	1.2	1	12				58.7	15.3	54.3	37.4	57	59.5	18.3	62.4
47	2.85714	2.6	2.66667	45	3			2.3	8.5	26.9	37.4	32.7	53.3	5.6	46.5
48	1.57143	1.2	1.5	15.6	0	0	0	34	22.1	35.3	37.4	43.5	53.3	31.1	35.8
50	2.71429	2.8	2	31.1	5.1	1.4	1.6	19.9	32.4	35.3	17.6	51.6	56.4	31.1	54.4
52	2.85714	2.2	1.33333	23.3				55.1	56.2	44.2	57.1	62.4	62.5	56.6	65.1
53	3	2.33333	3	37.8			5	16.4	29	40.2	11.1	37	22.6	22.5	11.9
56	2.28571	2.5	2.6	6.7	2.1	1.3	2.1	16.4	22.1	45.5	30.8	42.4	47.2	26.8	51.8
57	1.6	1	1.5	2.5	0	0	0	-4.7	-12	52.6	30.8	51.6	7.2	1.3	-1.4
58	3	2	2.5	30	5	5	5	34	49.4	39.7	57.1	40.8	53.3	52.3	57.1
59	2.42857	2	2.16667	31.1	3.3	3.3	3.3	27	29	26.9	30.8	28.9	34.9	31.1	35.8
60	1.33333	1.2	1.33333	0				44.6	56.2	61.4	57.1	48.9	50.2	56.6	51.8
61	1.57143	1.4	1.66667	2.2	0	0	0	41	29	49.9	30.8	43.5	37.9	22.5	33.2
63	2	1	1	0	0		2	58.7	56.2	61.4	57.1	59.7	65.6	56.6	65.1
101	3.14286	2.8	3.16667	60	6	6.3	6.3	27	15.3	30.9	30.8	37	37.9	18.3	35.8
102	1.71429	1.2	1.66667	12	2.3	1.3	0	51.6	29	40.2	37.4	51.6	41	31.1	54.4
103	2.57143	2	2.66667	28.9	2.7	6.6	6.8	37.5	25.6	35.3	37.4	37	59.5	39.6	54.4
104	3	2	2	8.9	1	1	0	30.5	39.2	49.9	43.9	65.1	50.2	56.6	43.8
201	3.85714	3.2	3.33333	42.2	1	4	4	-1.2	8.5	31.3	4.5	46.2	44.1	14.1	30.5
202	1.85714	1	1.66667	33.3	3.9	3.7	0.2	41	29	35.3	30.8	46.2	47.2	31.1	41.1
204	2.14286	1.8	1.16667	20	2	0	0	48.1	25.6	40.2	30.8	46.2	41	31.1	46.5
205	1.28571	1.2	1	2	0	0	0.5	55.1	56.2	61.4	57.1	45.1	62.5	56.6	62.4
207	1.57143	1	1	0	0.8	0	0	37.5	56.2	49	50.5	47.8	65.6	56.6	65.1
209	1.71429	1	1.33333	8.9	0	0	2	48.1	42.6	49.9	50.5	57	59.5	43.8	49.1
211	2	1.4	1.66667	12	1.6	0.5	0.5	23.4	29	40.2	50.5	38.1	50.2	31.1	46.5
213	2.57143	1.2	1.5	8.9	3	3	3.5	34	32.4	40.2	43.9	46.2	56.4	43.8	46.5
214	3.42857	2.8	2.5	58	1.9	4.2	5.8	16.4	15.3	30.9	17.6	42.4	44.1	14.1	46.5
215	3.57143	2	3	53.3	6	7	9	16.4	1.7	30.9	11.1	26.2	41	5.6	33.2
217	1.5	1.2	1.66667	2.5		0	0	58.7	56.2	49.9	37.4	46.2	56.4	56.6	43.8
220	2.28571	1.8	2	28.9	2	1.8	1.7	19.9	29	40.2	37.4	43.5	47.2	31.1	43.8
301	2.4	1.8	1.5	48.9			6.5	9.4	15.3	26.9	17.6	26.2	44.1	18.3	33.2
302	1.16667	1.4	1.33333	6.7	0	0	0	51.6	35.8	54.3	43.9	40.8	50.2	35.3	54.4
304	2.85714	2.2	2.83333	24.4	4	5	5	27	18.8	40.2	24.2	43.5	41	31.1	38.5
305	2.42857	2	2	15.6	2.5		3.2	51.6	46	49	57.1	43.5	62.5	43.8	62.4
306	1.66667	1.2	2	13.3	0.9	0.9	0.8	48.1	29	40.2	30.8	51.6	44.1	31.1	51.8
307	1.28571	1	1.5	5.7	5			9.4	-12	48.1	43.9	43.5	68.7	-7.2	65.1
309	3.71429	2.6	1.66667	37.8	3.5	2	3	27	18.8	40.2	37.4	40.8	50.2	22.5	46.5
401	1.28571	1	1.16667	0	1.5	0	0	55.1	56.2	61.4	57.1	37	53.3	56.6	49.1
402	2.14286	1.8	2	34	5.1	0	0.6	44.6	18.8	35.3	57.1	59.7	53.3	31.1	62.4
501	3.14286	2	3	28	2	1	4	23.4	-12	8.3	-8.7	39.7	7.2	-7.2	-1.4
503	1.28571	2	1	4.4	1	0	0	37.5	56.2	49	57.1	58.6	65.6	56.6	62.4
504	2.85714	2	3	28.9	6	6	1	30.5	39.2	35.3	24.2	43.5	44.1	31.1	43.8
505	3.57143	2.6	2.33333	35.6	2	3	3	27	18.8	30.9	17.6	34.3	41	5.6	46.5
506	1.14286	1	1	2.2	0	0	0	41	49.4	61.4	57.1	57	68.7	52.3	62.4
507	3.28571	3.6	2.83333	68.9	5	10	0	-4.7	1.7	22.5	30.8	42.4	41	5.6	41.1
508	3.33333	3.5	2.83333	57.1		10	10	-8.2	8.5	26.9	24.2	55.9	37.9	9.8	30.5
509	2.42857	1.8	2	14	0	3.9	8.4	19.9	25.6	49.9	30.8	40.8	41	14.1	14.6
510	1.85714	1	1	22.9				23.4	-12	61.4	57.1	40.8	22.6	-7.2	11.9
511	1.83333	1.4	1.66667	15.6			1	37.5	35.8	49.9	37.4	54.3	53.3	31.1	54.4
512	1.66667	1.4	1.83333	15	0	0	0	27	25.6	61.4	-8.7	43.5	50.2	31.1	54.4
514	1.28571	1	1.16667	2.2	0	0	0	55.1	46	61.4	57.1	46.2	59.5	56.6	59.7
515	2.85714	2	2.83333	40	1.5	3.3	4.4	30.5	25.6	40.2	30.8	31.6	28.7	22.5	30.5
517	2.57143	2.8	2.16667	44.4	2	5	0	30.5	5.1	35.3	30.8	46.2	37.9	5.6	25.2
520	3	2.6	2	33.3	5.6	6.7	0.6	19.9	18.8	30.9	24.2	37	37.9	18.3	54.4
521	3.42857	2.2	3.33333	44	4	8	9.5	9.4	11.9	22.5	11.1	28.9	31.8	18.3	17.2
523	2.85714	2.2	2.16667	13.3	1.4	4.4	4.9	48.1	46	39.7	43.9	43.5	44.1	39.6	35.8
524	2			7.5	0.8		0.8	48.1	46	49	57.1	43.5	56.4	48	62.4
526	1.33333	1	1	0				37.5	56.2	61.4	57.1	48.9	53.3	56.6	33.2
527	1.57143	1	1.33333	6	0	0	0.8	48.1	35.8	49.9	43.9	67.8	50.2	43.8	46.5
529	2.28571	2.2	2.5	44.4	0	1	1	30.5	1.7	35.8	24.2	46.2	37.9	5.6	33.2
531	1.71429	1	1.5	2			1.5	34	52.9	61.4	50.5	54.3	56.4	52.3	59.7
533		2.25		46.7	5.3	5.3	1.3	12.9	18.8	8.3	4.5	45.1	65.6	18.3	62.4
534	2.71429	2.8	3.33333	71.4		7	10	-8.2	-1.8	49.9	17.6	42.4	53.3	5.6	27.8
535	4.42857	3.2	3.16667	57.5	9	9	9	-47	25.6	8.3	11.1	32.7	31.8	31.1	33.2
536	1.57143	1.4	1.16667	6.7	1	1	1	55.1	49.4	44.6	50.5	48.9	56.4	56.6	57.1
537	4.71429	3.4	3.33333	82.2	5	5	5	-11.8	1.7	17.2	30.8	37	13.3	5.6	14.6
539	1.85714	1.4	1	22.2	0	2.1	1.1	34	35.8	40.2	43.9	65.1	50.2	39.6	65.1
541	1.71429	1.4	1.16667	24	0.7	0	0	41	22.1	49.9	30.8	57	53.3	18.3	43.8
542	1.33333	1.4	1.5	7.5	0	0	0	37.5	25.6	61.4	17.6	48.9	50.2	26.8	41.1
543	2.14286	2.6	2.16667	40	0.5	1.1	2.3	37.5	29	49.9	30.8	37	44.1	31.1	41.1
544	2.57143	1.2	1.5	12	0.5		0.7	27	5.1	8.3	-2.1	43.5	34.9	5.6	25.2
545	3.28571	1.6	3.16667	35.6			6.5	12.9	8.5	26.9	24.2	40.8	50.2	9.8	43.8
548	4.42857	3.25	4	66	9	9	9	2.3	8.5	26.9	11.1	20.8	25.6	18.3	19.9
549	3.14286	2	3	32	3.6	3.5	7.7	44.6	22.1	30.9	24.2	46.2	37.9	31.1	38.5
601	1.66667	1.2	2	2.2	0	0	1	44.6	42.6	61.4	30.8	35.4	50.2	43.8	49.1
602	3.28571	2.4	3.33333	64.4	3	7	10	19.9	18.8	35.8	17.6	23.5	37.9	18.3	38.5
607	2.57143	1.8	2.66667	18	3	3	6	44.6	29	40.2	57.1	43.5	47.2	31.1	43.8
610	2.57143	2	2.33333	42.5	6.5	7	6	30.5	29	30.9	24.2	31.6	34.9	18.3	30.5
701	1.42857	1	1.16667	2	1.3	0	0	51.6	56.2	49	57.1	43.5	56.4	56.6	51.8
702	1.71429	1	1.66667	4.4	0	1.4	0	55.1	56.2	49	57.1	46.2	59.5	56.6	51.8
703	2.42857	1	2.33333	17.8	1.2	0.5	4.9	37.5	25.6	40.2	30.8	43.5	37.9	43.8	46.5
801	2.28571	1.6	2.16667	24.4	1.3	1.3	3.8	34	18.8	40.2	24.2	48.9	47.2	18.3	57.1
803	3.28571	2.4	3.33333	51.1	8	6	6	12.9	18.8	35.3	17.6	39.7	31.8	18.3	33.2
805	2	1	1.5	16	0.8	0	0	51.6	49.4	49.9	43.9	46.2	59.5	43.8	59.7
806	2.85714	2.2	2	25	0	4	0	27	29	30.9	57.1	69.4	68.7	56.6	65.1
901	2.28571	1.4	1.83333	31.1	1	1	1	44.6	42.6	49.9	50.5	43.5	53.3	56.6	51.8
902	1.66667	1.4	1.83333	22.2	0	0	0	37.5	22.1	40.2	57.1	48.9	44.1	31.1	54.4
903	2.14286	1.6	2.33333	28	3	1	1	44.6	39.2	40.2	24.2	48.9	44.1	43.8	33.2
904	2.85714	2.2	2.83333	44.4	4.4	3.3	6.3	9.4	29	35.3	30.8	38.1	44.1	31.1	35.8
905	2.28571	1.4	2.16667	22.2	6	2	0	51.6	42.6	39.7	43.9	43.5	47.2	56.6	51.8
906	2.57143	2.8	3.33333	34	4.9	1.8		19.9	15.3	35.8	43.9	43.5	41	5.6	41.1
907	1	1	1	0	0	0	0.5	58.7	56.2	61.4	57.1	62.4	62.5	56.6	62.4
908	2.28571	2	2.16667	44.4	4	4	1	12.9	5.1	31.3	24.2	37	47.2	5.6	38.5
1001	1.83333	1.6	1.66667	8.9	0	0	2	34	29	49	37.4	51.6	53.3	43.8	57.1
1003	2.42857	1.8	2.33333	27.5	0	7.5	7.8	23.4	5.1	35.3	24.2	39.7	37.9	18.3	41.1
1004	2.14286	1.2	1.33333	15.6	0	2.8	0	55.1	42.6	61.4	30.8	46.2	50.2	56.6	43.8
1101	2.14286	1	2	6.7	1	1	1	44.6	52.9	49	43.9	35.4	47.2	56.6	51.8
1102	1.42857	1.4	1.66667	0	0.9	0	1.1	51.6	35.8	61.4	43.9	54.3	50.2	48	43.8
1103	2.14286	1.4	2.16667	31.1	0	1.3	4.5	9.4	1.7	36.6	17.6	57	44.1	39.6	49.1
1105	2	2	2	28.9	8	5	0	30.5	42.6	35.3	37.4	46.2	41	35.3	43.8
1108	1.42857	1.2	1.83333	2.5	0	0	0	27	29	49	4.5	48.9	41	56.6	43.8
1109	2.42857	1.4	1	20	1.2	0	2	34	56.2	44.6	57.1	67.8	37.9	52.3	62.4
1110	1.57143	1	1.5	17.8	0.9	2.4	0	51.6	39.2	44.6	43.9	51.6	56.4	48	57.1
1111	2.42857	1.8	2.16667	24.4	0	0	2	37.5	32.4	44.6	37.4	51.6	44.1	35.3	35.8
1114	2.28571	1.4	1.83333	31.1	3	4	2	37.5	29	35.3	30.8	39.7	44.1	31.1	46.5
1115	1.85714	1	1.66667	10	2.2	0	2.5	48.1	25.6	49.9	30.8	57	47.2	31.1	51.8
1116	1.57143	1.2	1	0	0	0	0	58.7	56.2	61.4	57.1	57	65.6	56.6	65.1

## Sheet: ICC_test-retest
ID	ZCQsymptom_pre	ZCQfunction_pre	ZCQsatisfuction_pre	ZCQsymptom_post	ZCQfunction_post	ZCQsatisfuction_post
1	2.85714	1.6	2.5	3.42857	1.8	3
2	2.71429	1.8	2.66667	3.14286	2	3
3	2.14286	1.6	1.83333	2.14286	1.4	1.83333
4	2.28571	2	1.66667	2.85714	2	2.16667
5	1	1	1	1	1	1
6	1.42857	1	1	1.57143	1.2	1
7	1.83333	1.2	1.33333	1.85714	1.2	1.5
11	1.71429	1.2	1.33333	2	1.2	1.33333
12	2.16667	2	2	2.28571	2	2
14	2.33333	1	2.16667	2.16667	1	2.16667
17	2	2.2	1.5	2.14286	2.2	1.66667
18	2.14286	1.6	1.5	2.28571	1.6	1.66667
19	2.14286	1	1.33333	1.83333	1	1.66667
20	1.85714	1.4	1.83333	1.83333	1.6	1.66667
21	1.71429	1	1.66667	2.2	1	1.33333
22	2	1.8	1.5	2.28571	1.8	2
27	1.14286	1.2	1	1	1.2	1
33	2.85714	2.4	3.5	2.85714	2.4	3.5
35	2.28571	1.8	2	2.85714	2	2
36	2.57143	1.4	1.66667	2.42857	1.4	1.66667
37	1.42857	1	1.83333	1.42857	1	1
38	1.71429	1.2	1.5	2	1.8	1.5
39	3.57143	3	3.5	2.85714	3.2	3.16667
40	2.42857	3.2	2.83333	3.14286	3.25	2.6
41	2.85714	1.2	2	2.71429	1.4	2
42	1	1.2	1	1.71429	1.4	1.16667
48	1.57143	1.2	1.5	1.42857	1.2	1.33333
50	2.71429	2.8	2	2.71429	3	2
52	2.85714	2.2	1.33333	2	1.2	1.16667
53	3	2.33333	3	3.16667		2.6

## Sheet: Cronbach-α_symptom
ID	q1_1	q1_2	q1_3	q1_4	q1_5	q1_6	q1_7c
1	4	4	3	4	4	4	5
2	3	3	3	4	3	3	5
3	4	3	3	4	4	3	1
4	4	4	4	3	4	3	5
5	3	3	3	3	3	1	1
6	3	4	3	3	3	1	1
7	3	3	3	3	3	3	5
8	4	4	4	3	3	3	3
9	4	4	3	3	5	4	5
10	4	3	4	4	3	4	3
11	3	5	3	4	4	3	1
12	2	4	2	2	2	3	3
13	4	4	4	4	4	2	5
14	3	3	3	3	4	4	3
15	3	4	2	3	2	2	3
16	2	3	2	2	2	2	1
17	3	4	3	3	3	3	3
18	4	4	4	3	4	3	3
19	3	3	3	3	3	3	5
20	4	4	3	4	3	1	1
21	4	5	4	4	3	3	3
22	3	4	2	3	2	3	3
23	3	3	2	3	2	3	3
24	4	3	4	3	2	4	3
27	3	3	2	4	3	1	1
28	4	5	4	2	4	3	5
29	4	2	4	4	3	2	3
31	4	4	4	4	4	4	3
32	3	3	3	3	2	1	3
42	4	4	4	4	4	4	1
43	3	4	3	3	3	3	5
46	3	4	3	3	3	2	3
47	5	5	5	5	5	3	5
48	3	3	3	3	3	3	5
49	4	5	4	4	4	3	3
50	4	2	3	3	3	2	3
51	4	4	4	4	4	3	3
52	4	4	4	4	4	3	3
54	3	4	4	3	3	3	1
55	4	4	3	4	4	4	5
56	5	4	3	4	4	4	5
57	3	3	3	3	2	1	3
59	3	3	4	3	4	3	5
60	4	4	4	3	1	3	3
62	3	5	2	5	5	3	1
63	4	4	3	4	4	3	5
64	3	4			4	3	5
101	5	5	5	5	5	5	5
102	3	3	3	3	2	2	3
103	4	5	4		3	4	5
104	5	5	5	1	1	1	1
201	4	4	4	4	4	4	5
202	3	4	3	3	3	3	3
204	4	5	4	4	4	3	3
205	3	4	2	3	3	1	3
207	5	5	4	2	5	2	3
209	4	4	3	4	4	3	5
210	3	4	3		3	2	3
211	3	3	3	3	2	3	5
213	3	4	2	3	4	2	1
214	4	5	4	4	4	5	5
215	5	5	5	5	5	5	5
218	4	4	4	3	2	3	5
219	4	5	4	3	4	3	1
220	3	4	3	3	4	4	5
301	4	5	4	4	4	4	5
302	3	4	3	2	2	2	1
303	4	4	4	2	2	2	5
304	3	4	3	3	3	4	5
305	4	4	4	4	4	2	3
306	3			3	2	3	5
307	5		5	3	3	3	3
308	5	5	4	5	4	4	3
401	2	4	2	2	2	1	3
402	4	4	4	3	4	3	3
501	2	3	2	2	4	4	5
502	4	5	4	4	4	4	5
503	4	5	4	4	3	2	3
504	2	3	2	2	5	3	5
505	4	4	5	4	4	4	5
506	4	4	4	3	4	4	5
507	1		1	3		3	3
508	4	4	2	5	5	4	5
509	3	4	3	4	4	5	3
510	5	5	5	5	4	3	5
511	4	4	2	3	3	2	3
512	4	4	4	4	1	2	5
513	4	4	3	3	3	4	3
514	3	3	2	3	3	2	3
515	3	5	3	2	2	2	3
516	4	5	4		4	3	5
517	4	4	3	4	3	3	5
518	3	4	3	3	4	3	3
519	4	3	4	3	3	3	5
520	4	5	4	4	3	3	3
521	5	4	3	4	4	3	3
522	5	4	4	4	4	4	5
523	4	4	1	4	4	3	3
524	5	5	4	5	3	4	3
525	5	4	5	5	3	3	3
526	3	3	3	3	3	2	1
527	3	3	3	3	2	2	1
528	4	5	5	5	5	5	5
529	3	4	2	3	2	3	5
530	3	4	3	2	3	1	1
531	3	4	3	1	3	1	1
532	3	4	3	3	4	3	5
533	5	4	5	5	4	2	5
534	3	3	2	4	5	3	5
535	4	4	4	4	4	4	5
536	4	4	4	4	3	3	3
537	5	5	5	5	5	5	5
538	5	4	4	5	4	2	3
539	2	2	2	2	3	2	3
540	5	4	4	2	3	1	1
541	4	5	5	3	4	2	3
542	3	3	3	3	2	3	3
543	2	4	3	2	3	3	5
544	4	4	4	4	3	3	3
545	4	4	4	4	3	4	3
546	4	4	4	4	2	2	1
547	3	3	3	4	4	3	3
548	5	5	5	5	5	5	5
549	3	3	3	2	4	3	5
601	3	3	3	3	2	2	3
602	5	4	5	5	4	5	5
604	4	4	4	3	4	4	5
605	2	2	2	2	2	3	3
606	2	2	2	3	3	4	5
607	3	4	3	3	3	2	3
608	4	3	4	3	1	2	3
609	3	3	2	3	3	2	3
610	4	5	4	4	3	4	5
611	3	4	2	3	4	3	5
613	3	4	4	3	4	3	3
701	4	4	4	4	2	4	5
702	3	4	3	3	3	3	3
703	2	4	2	1	4	3	3
801	4	4	3	4	5	4	3
802	5	4	4	5	1	4	3
803	3	4	3	3	2	3	5
804	3	3	3	3	3	3	3
805	4	4	3	4	3	3	3
806	5	4	5	5	1	1	5
807	5	5	4	5	5	5	3
808	4	4	4	3	4	2	1
809	4	4	2	1	1	2	1
901	3	4	2	2	4	3	5
902	5	5	2	5	3	2	3
903	2	2	2	2	2	2	3
904	2	2	2	2	3	3	3
905	3	4	3	3	3	2	1
906	2	5	2	2	2	2	3
907	4	4	2	4	3	3	3
908	5	5	5	5	4	5	5
909	4	4	4	3	4	4	5
910	3	5	2	3	3	3	5
911	4	4	4	3	1	3	1
912	5	5	5	5	5	3	3
1001	4		4	1	3	3	5
1002	2	3	2	2	2	1	1
1003	4	4	3	4	3	4	3
1004	4	4	4	4	4	3	5
1005	4	4	3	4	3	4	1
1101	3	5	3	2	3	2	5
1102	3	4	3	3	2	2	5
1103	3	3	3	3	3	3	5
1104	4	4	3	4	2	2	5
1105	3	5	3	2	3	3	3
1106	4	5	4	5	4	4	5
1107	3	3	3	4	4	3	3
1108	1	1	1	1	2	2	3
1109	4	3	4	4	3	2	3
1110	3	4	3	3	3	3	5
1111	2	1	2	2	4	3	3
1112	3	4	3	3	2	2	3
1113	4	4	3	4	4	3	3
1114	4	4	4	4	3	3	3
1115	3	5	3	2	2	3	5
1116	5	5	4	4	4	4	5

## Sheet: Cronbach-α_function
ID	q2_1	q2_2	q2_3	q2_4	q2_5
1	3	3	3	3	3
2	2	3	3	3	2
3	3	3	3	2	2
4	4	2	3	3	3
5	2	3	2	2	2
6	2	3	3	3	3
7	3	2	2	2	1
8	2	2	3	3	3
9	3	3	3	3	3
10	3	3	4	2	3
11	3	3	3	3	3
12	2	3	3	3	3
13	3	3	3	3	3
14	2	3	3	3	3
15	4	2	4	2	1
16	3	2	2	1	1
17		3	3	3	3
18	4	4	4	3	3
19	2	2	2	1	1
20	2	3	3	3	3
21	2	3	3	3	3
22	2	2	2	2	2
23	2	2	2	2	2
24	3	3	3	2	2
27	2	3	2	1	1
28	3	4	4	2	2
29	2	2	2	2	2
31	3	4	4	3	3
32	3	2	2	1	1
42	3	3	3	3	3
43	3	3	3	2	2
46	3	3	2	2	2
47	4	3	4	3	3
48	3	3	3	3	3
49	3	3	3	3	3
50	3	2	2	2	2
51	4	3	3	3	3
52	3	3	3	3	3
54	3	3	3	2	2
55	3	3	4	3	3
56	4	4	4	3	3
57	3	3	4	2	2
59	2	2	2	2	2
60	3	3	4	3	3
62	3	4	3	2	1
63	2	2	1	1	1
64	3	4	2	3	3
101	4	4	4	3	3
102	1	3	3	2	1
103	2	3	3	3	3
104	4	4	3	3	3
201	4	4	4	3	3
202	3	3	3	2	2
204	2	3	3	3	3
205	3	3	3	1	1
207	3	3	3	4	4
209	2	3	3	3	3
210	3	3	3	3	3
211	3	3	3	2	2
213	3	1	2	1	1
214	4	4	4	3	3
215	3	4	4	3	3
218	4	3	3	3	3
219	3	3	3	3	3
220	4	3	3	3	3
301	4	3		3	3
302	3	3	3	3	2
303	3	2	3	2	2
304	3	3	3	3	3
305	3	3	3	3	3
306	3	3	3	3	2
307	2	3	3	3	3
308	3	3	3	3	3
401	2	2	2	2	2
402	3	3	3	3	3
501	2	2	2	2	2
502	3	4	4	3	3
503	2	3	3	3	3
504	2	2	2	2	2
505	3	3	3	3	3
506	2	3	3	2	3
507	4	3	3	2	4
508	4	4	4	3	3
509	3	2	4	3	3
510		4	4	4	3
511	3	2	2	2	2
512	4	4	4	2	2
513	3	4	4	2	3
514	2	2	2	2	2
515	3	2	2	2	2
516	4	3	3	3	3
517	4	3	3	3	3
518	3	4	4	3	3
519	2	4	4	3	2
520	3	3	3	3	3
521	3	3	2	2	2
522	4	3	3	3	3
523	2	3		2	2
524	3	3	3	2	2
525		3	2	3	2
526	4	2	2	2	1
527	3	3	3	3	2
528	4	4	3	4	3
529	3	3	4	3	2
530	2	3	3	1	1
531	1	1	1	1	1
532	3	3	3	3	3
533	4	4	4	3	3
534	4	3	3	3	3
535	3	3	3	3	3
536	4	3	3	3	3
537	4	4	3	3	3
538	3		3	3	3
539	2	2	2	2	1
540	4	3	3	3	2
541	3	4	3	3	3
542	3	2	3	2	2
543	3	2	2	2	2
544	4	3	3	3	3
545	3	4	3	3	3
546	3	3	3	1	1
547	2	2	2	2	2
548	4	3	3	3	3
549	2	3	2	2	2
601	2	2	2	2	2
602	4	4	4	3	3
604	3	3	3	3	3
605	2	4		1	1
606	3	3	3	2	1
607	3	2	2	2	2
608	2	2	2	2	2
609	3	2	2	1	1
610	2	3	2	2	2
611	3	4	3	2	2
613	3	3	3	3	3
701	4	4	4	3	3
702	2	2	2	2	2
703	1	3	3	2	2
801	3	3	3	2	2
802	4	3	3	3	3
803	2	3	3	3	3
804	2	2	2	2	2
805	4	4	4	3	3
806	4	4	3	3	3
807	3	3	3	3	3
808	3	4	3	2	2
809	2	2	2	2	1
901	3	4	4	3	3
902	3	3	3	3	3
903	1	2	2	1	1
904	4	3	3	3	3
905	1	3	3	2	2
906	2	2	2	2	2
907	2	3	3	2	2
908	4	4	4	3	3
909	3	2	2	2	2
910	2	3	3	3	3
911	3	3	3	2	1
912	1	3	3	3	3
1001	2	3	2	1	1
1002	2	2	2	1	1
1003	2	4	4	3	2
1004	3	3	3	2	1
1005	4	4	4	3	3
1101	2	3	3	3	3
1102	3	2	2	2	2
1103	4	4	4	1	2
1104	2	3	3	2	2
1105	2	2	2	2	2
1106	2	3	3	3	3
1107	2	3	3	2	2
1108	3	2	2	1	1
1109	3	3	3	3	3
1110	2	2	2	2	2
1111	2	2	2	2	1
1112	2	3	3	3	3
1113	3	3	2	1	1
1114	3	3	3	2	2
1115	2	3	3	2	2
1116	4	3	3	3	3

## Sheet: Cronbach-α_satisfuction
ID	q3_1	q3_2	q3_3	q3_4	q3_5	q3_6
1	2	2	2	3	3	3
2	2	2	3	3	3	3
3	2	2	2	2	2	1
4	1	2	2	2	1	2
5	1	1	1	1	1	1
6	1	1	1	1	1	1
7	1	1	1	1	2	2
9	1	1	2	2	1	2
10	2	1	2	2	2	3
11	1	1	1	2	2	1
12	1	2	2	2	3	2
14	2	1	2	2	3	3
15	1	1	2	2	2	2
16	1	1	1	1	1	1
17	1	1	1	2	2	2
18	1	1	1	2	2	2
19	1	1	2	1	1	2
20	2	2	1	2	2	2
21	1	1	1	1	3	3
22	1	1	1	2	2	2
27	1	1	1	1	1	1
33	3	4	4	4	3	3
35	2	2	2	2	2	2
36	1	1	2	2	2	2
37	1	1	1	3	3	2
38	1	1	1	2	2	2
39	3	3	4	4	4	3
40	2	3	3	3	3	3
41	2	2	2	2	2	2
42	1	1	1	1	1	1
47	2	3	3	4	2	2
48	1	1	1	2	2	2
50	2	2	2	2	2	2
52	1	1	2	1	2	1
53	3	3	4		3	2
56	1	1	4		3	4
57	1	1	1	2	2	2
58	1	1	3	2	4	4
59	1	2	2	2	3	3
60	1	1	1	1	2	2
61	1	1	2	2	2	2
63	1	1	1	1	1	1
101	3	3	3	4	3	3
102	1	2	1	2	2	2
103	2	2	3	3	3	3
104	2	2	2	2	2
201	2	2	4	4	4	4
202	1	1	2	2	2	2
204	1	1	1	2	1	1
205	1	1	1	1	1	1
207	1	1	1	1	1	1
209	1	2	1	1	1	2
211	1	1	2	2	2	2
213	1	1	1	2	2	2
214	2	2	2	3	3	3
215	3	2	3	4	3	3
217	1	2	2	2	2	1
220	2	2	2	2	2	2
301	1	1	2	2	1	2
302	1	1	1	1	2	2
304	2	3	3	3	3	3
305	2	2	2	2	2	2
306	2	2	2	2	2	2
307	1	1	2	2	2	1
309	1	1	2	2	2	2
401	1	2	1	1	1	1
402	2	2	2	2	2	2
501	2	2	3	3	4	4
503	1	1	1	1	1	1
504	3	3	3	3	3	3
505	1	2	2	3	3	3
506	1	1	1	1	1	1
507	2	2	2	3	4	4
508	2	3	3	3	3	3
509		2	2	2	2	2
510	1	1	1	1		1
511	1	1	2	2	2	2
512	1	1	2	2	2	3
514	1	1	1	1	1	2
515	3	2	3	3	3	3
517	2	2	3	2	2	2
520	2	2	2	2	2	2
521	3	3	4	2	4	4
523	2	1	2	2	3	3
524				2	3	2
526	1	1	1	1
527	1	1	1	2	2	1
529	1	1	3	3	4	3
531	2	2	1	2	1	1
533	1	1	2
534	3	3	3	4	3	4
535	3	3	3	3	3	4
536	1	1	1	1	2	1
537	1	3	4	4	4	4
539	1	1	1	1	1	1
541	1	1	1	1	2	1
542	1	1	1	2	2	2
543	2	2	2	2	2	3
544	1	1	1	2	2	2
545	4	2	3	3	4	3
548	4	4	4	4	4	4
549	3	3	3	3	3	3
601	2	2	2	2	2	2
602	2	2	4	4	4	4
607	2	2	2	3	4	3
610	2	2	2	3	3	2
701	1	1	1	1	2	1
702	1	2	2	1	2	2
703	2	2	2	2	3	3
801	2	2	2	2	3	2
803	3	3	3	4	4	3
805	1	2	1	2	2	1
806	2	2	2	2	2	2
901	1	2	2	2	2	2
902	1	1	1	2	3	3
903	2	2	2	2	3	3
904	3	3	2	3	3	3
905	2	2	1	2	3	3
906	3	3	3	3	4	4
907	1	1	1	1	1	1
908	1	1	1	4	3	3
1001	1	1	1	3	2	2
1003	1	2	3	3	3	2
1004	1	1	1	1	2	2
1101	2	1	2	2	3	2
1102	1	1	2	2	2	2
1103	1	1	3	3	3	2
1105	2	2	2	2	2	2
1108	1	1	2	3	2	2
1109	1	1	1	1	1	1
1110	1	1	2	2	2	1
1111	1	2	2	3	2	3
1114	2	2	1	2	2	2
1115	1	1	2	2	2	2
1116	1	1	1	1	1	1
